# Supplementary material for: Estimates of Genetic Parameters for Milk, the Occurrence of and Susceptibility to Clinical Lameness and Claw Disorders in Dairy Goats
Source: MDPI journal article supplement (doi:10.3390/ani13081374), 2023-04-17
Supplement: s1 [file s1]

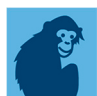

## Supplementary table

**Table S1.** Locomotion scoring strategy used to measure lameness in dairy goats (adapted from Deeming et al. 2018).

| Severity Score | Label           | Clinically<br>Lame | Limping | Gait Description                                                                                                                                                                           | Modifications                                                                                                      |
|----------------|-----------------|--------------------|---------|--------------------------------------------------------------------------------------------------------------------------------------------------------------------------------------------|--------------------------------------------------------------------------------------------------------------------|
| 0              | Normal/not lame | No                 | No      | Moving forward with even strides where hooves track up. Weight-bearing and no apparent head nodding.                                                                                       |                                                                                                                    |
| 1              | Uneven gait     | No                 | Uneven  | Moving forward with shorter strides where hooves do not track up. Weight-bearing, and having an absent head nodding, however, have joints that may show stiffness.                         |                                                                                                                    |
| 2              | Mildly lame     | No                 | Yes     | Moving forward with shorter strides where hooves do not track up. One or more legs/feet may be affected. Weight-bearing, and having an absent head nodding, however, may show a mild limp. |                                                                                                                    |
| 3              | Moderately lame | Yes                | Yes     | Reluctant to move forward and may display a moderate limp. One or more legs could be affected and may display some goose-stepping.                                                         |                                                                                                                    |
| 4              | Severely lame   | Yes                | Yes     | Walking on the knees. Refusal to bear any weight on one foot. Severe limping or extreme goose-stepping.                                                                                    | If there is no limp, however, they are walking forward and weight-bearing reluctantly. Multiple feet are involved. |
